# Supplementary material for: Reprogramming‐derived gene cocktail increases cardiomyocyte proliferation for heart regeneration
Source: PubMed Central journal article supplement (PMC5286362; doi:10.15252/emmm.201606558), 2016-12-23
Supplement: EMMM-9-251-s001.pdf [file EMMM-9-251-s001.pdf]

## **Appendix**

# **Reprogramming-derived Gene Cocktail Increases Cardiomyocyte Proliferation for Heart Regeneration**

**Yuan-Yuan Cheng, Yu-Ting Yan, David J. Lundy, Annie H.A. Lo,**

**Yu-Ping Wang, Shu-Chian Ruan, Po-Ju Lin & Patrick C.H. Hsieh**

Four appendix tables

Six appendix figures

## Appendix Tables

**Table S1.** List of genes from microarray showing > 2-fold up- or down-regulation at day 2 of CM reprogramming

| Up-regulation |             |             |               |               |             |
|---------------|-------------|-------------|---------------|---------------|-------------|
| Probe Name    | Gene Symbol | Fold Change | Probe Name    | Gene Symbol   | Fold Change |
| A_55_P1983858 | Scel        | 45.64251    | A_52_P232637  | Dhh           | 4.7735643   |
| A_51_P468260  | S100b       | 30.435705   | A_55_P2324976 | 5033406O09Rik | 4.7283297   |
| A_52_P449871  | Id4         | 22.281864   | A_66_P129622  | Phldb3        | 4.687701    |
| A_52_P65237   | Zbtb7c      | 13.476518   | A_55_P2072561 | Gm3065        | 4.5743523   |
| A_52_P734742  | Lrrc73      | 9.040887    | A_51_P346165  | Agpat4        | 4.557826    |
| A_55_P2128153 | Col6a1      | 8.170807    | A_55_P2078365 | Rgs12         | 4.5333815   |
| A_55_P1960157 | Bcat1       | 7.06457     | A_55_P2060243 | Itgbl1        | 4.4744444   |
| A_55_P2394308 | Fst         | 6.9435678   | A_51_P342871  | S100a10       | 4.420988    |
| A_55_P2435563 | Etl4        | 6.8120604   | A_51_P446510  | Emp3          | 4.39257     |
| A_55_P2052563 | Id1         | 6.740239    | A_55_P2023188 | Lsm2          | 4.327197    |
| A_52_P60353   | Greb1l      | 6.6704416   | A_51_P386539  | Rnf125        | 4.3269434   |
| A_51_P109258  | Cys1        | 6.6209254   | A_55_P2060592 | Hoxa1         | 4.1997914   |
| A_55_P1993723 | Acsbg2      | 6.5329037   | A_51_P273556  | Fam83d        | 4.17568     |
| A_55_P2044143 | Loxl4       | 6.458679    | A_55_P2088615 | Fbln5         | 4.146144    |
| A_52_P281145  | Kank4       | 6.4442263   | A_55_P2176792 | Sh3gl3        | 4.115314    |
| A_51_P497724  | Apol7a      | 6.3823647   | A_55_P1954221 | Emp1          | 4.046907    |
| A_52_P381484  | Spon2       | 6.2921624   | A_55_P1992572 | Celf4         | 4.0398936   |
| A_55_P1962224 | Afap1l2     | 6.124147    | A_55_P1978962 | Slc9a3r2      | 4.038525    |
| A_52_P216672  | Klk8        | 6.088077    | A_66_P103654  | Asxl3         | 4.0326796   |
| A_55_P2059765 | Foxf1       | 6.0161486   | A_66_P109460  | Mtfr2         | 3.9742641   |
| A_52_P78373   | Sorbs3      | 6.0027595   | A_66_P136228  | Rai14         | 3.964933    |
| A_55_P2116180 | Mrgprf      | 5.9930716   | A_51_P453475  | Slc1a5        | 3.9449556   |
| A_51_P481159  | Cbr3        | 5.9385004   | A_55_P1996946 | Cdc20         | 3.9338164   |
| A_55_P1982404 | Gpm6b       | 5.934873    | A_51_P519008  | Mkx           | 3.8981695   |
| A_52_P187940  | Lfng        | 5.7675996   | A_55_P1997141 | Mybl2         | 3.890319    |
| A_52_P479262  | Col6a3      | 5.6138806   | A_51_P284665  | Plcb1         | 3.884924    |
| A_66_P107231  | Loxl4       | 5.5048423   | A_51_P427516  | Thsd1         | 3.868489    |

|               |           |           |               |          |           |
|---------------|-----------|-----------|---------------|----------|-----------|
| A_55_P2282969 | Gm2a      | 5.4894214 | A_51_P344566  | Plk1     | 3.864454  |
| A_55_P2043627 | Fam89a    | 5.430696  | A_55_P2054663 | Cox4i2   | 3.8643885 |
| A_55_P1960238 | Slc2a6    | 5.430179  | A_55_P2068892 | Il6ra    | 3.8381197 |
| A_55_P1978927 | Srgap1    | 5.2673154 | A_55_P2004248 | Apcdd1   | 3.8375382 |
| A_51_P245368  | Abcb1b    | 5.0189505 | A_51_P362661  | Spin4    | 3.8306196 |
| A_55_P2079669 | Bcat1     | 4.99613   | A_52_P110534  | Ttk      | 3.8258631 |
| A_55_P2041828 | Tubb3     | 4.9266286 | A_52_P162099  | Ckap2    | 3.8220913 |
| A_55_P2091196 | Hrct1     | 4.8966403 | A_55_P2089035 | Pole     | 3.820475  |
| A_52_P106620  | Tnfrsf11b | 4.856102  | A_55_P2025033 | Cep55    | 3.8159385 |
| A_52_P190647  | Mxd3      | 3.8075    | A_51_P255456  | Cyp1b1   | 3.4338624 |
| A_66_P134542  | Anln      | 3.7966588 | A_55_P2050439 | Dlgap5   | 3.4318545 |
| A_55_P2065671 | Ccnb1     | 3.7957191 | A_52_P411003  | Dlgap5   | 3.4307065 |
| A_55_P2136318 | Slc1a5    | 3.794008  | A_55_P1966332 | Plac9a   | 3.4234562 |
| A_52_P520466  | Kif18b    | 3.7776713 | A_55_P2100209 | Kif2c    | 3.413538  |
| A_55_P2090060 | Mab21l3   | 3.7619236 | A_55_P2022211 | Plxdc2   | 3.4097457 |
| A_51_P125205  | Aqp1      | 3.7459762 | A_55_P2061739 | Tmsb4x   | 3.4020982 |
| A_51_P270355  | Dclk1     | 3.7252653 | A_55_P2076048 | Nuf2     | 3.4011672 |
| A_51_P363749  | Irf6      | 3.7250223 | A_55_P1991605 | Aplp1    | 3.3956993 |
| A_52_P148212  | Mis18bp1  | 3.655101  | A_51_P515120  | Hs3st3a1 | 3.3558095 |
| A_55_P2023692 | Neurl1a   | 3.6530645 | A_51_P275697  | Fam101b  | 3.3437078 |
| A_51_P324287  | Kif23     | 3.6165519 | A_55_P2172201 | Zfp57    | 3.3272264 |
| A_55_P1966327 | Plac9a    | 3.6114252 | A_52_P35057   | Kctd17   | 3.3261037 |
| A_55_P2128668 | Ccnb1     | 3.608869  | A_51_P233928  | B4galnt1 | 3.3256085 |
| A_55_P2111478 | Polq      | 3.603814  | A_51_P288876  | Tmem45a  | 3.3254223 |
| A_51_P481920  | Ccna2     | 3.5933723 | A_55_P2139889 | Zfp783   | 3.3180504 |
| A_55_P1996941 | Ube2c     | 3.5617204 | A_52_P628067  | Cdca3    | 3.312787  |
| A_51_P253803  | Mki67     | 3.5542693 | A_55_P1988228 | Aspm     | 3.3036397 |
| A_52_P588881  | Iqgap3    | 3.5460815 | A_51_P481398  | Kif11    | 3.2819011 |
| A_66_P114695  | Cdc25c    | 3.5441322 | A_55_P2158011 | Knstrn   | 3.2691545 |
| A_52_P515769  | Pcdh12    | 3.5343127 | A_51_P501018  | Nek2     | 3.2683141 |
| A_55_P1952256 | Ccnb1     | 3.5285118 | A_51_P289889  | Npnt     | 3.2646446 |
| A_51_P451151  | Ube2c     | 3.5246308 | A_51_P164014  | Cenpe    | 3.2354968 |
| A_55_P1983450 | S100a4    | 3.5200028 | A_52_P251366  | Neil3    | 3.2346928 |
| A_51_P381260  | Fxyd5     | 3.5123565 | A_51_P279712  | Rell1    | 3.2332022 |

|               |           |           |               |           |           |
|---------------|-----------|-----------|---------------|-----------|-----------|
| A_51_P303749  | Depdc1b   | 3.5091054 | A_55_P1994997 | Arhgap11a | 3.2256691 |
| A_55_P2173313 | Plcb1     | 3.5016758 | A_55_P2164957 | Slc9a3r2  | 3.2222402 |
| A_55_P2016618 | Neurl1a   | 3.49488   | A_51_P320022  | Atp10a    | 3.2138982 |
| A_51_P140641  | Eva1a     | 3.482435  | A_55_P2059010 | Rbp1      | 3.2074208 |
| A_51_P240453  | Nusap1    | 3.4736712 | A_52_P399584  | Ckap2l    | 3.2073534 |
| A_55_P2073377 | Mki67     | 3.4709878 | A_66_P125209  | Kif2c     | 3.1988144 |
| A_55_P2096947 | Ereg      | 3.462979  | A_55_P1983448 | S100a4    | 3.194373  |
| A_55_P2114201 | G2e3      | 3.4441366 | A_55_P1985433 | Nrg1      | 3.192924  |
| A_55_P2012389 | Sfxn3     | 3.4359188 | A_55_P1983769 | Birc5     | 3.1925611 |
| A_51_P326994  | Calhm2    | 3.4341128 | A_52_P27020   | Sgol2     | 3.187126  |
| A_55_P2181928 | Slc45a3   | 3.1808927 | A_55_P2025790 | Fanci     | 3.1838439 |
| A_52_P658437  | Espl1     | 3.168732  | A_52_P633714  | Troap     | 2.9917948 |
| A_51_P155142  | Cdca8     | 3.1658123 | A_52_P30989   | Cdkn3     | 2.987538  |
| A_52_P139650  | Ska1      | 3.159886  | A_51_P369200  | Tpx2      | 2.9870327 |
| A_51_P254805  | Kif4      | 3.1572728 | A_55_P1980631 | Aurkb     | 2.9868243 |
| A_51_P396983  | Ssu2      | 3.1478918 | A_51_P481693  | Ero1l     | 2.9864867 |
| A_55_P1988083 | Prc1      | 3.1477556 | A_55_P1983768 | Birc5     | 2.9853733 |
| A_55_P1983773 | Birc5     | 3.1413915 | A_51_P457196  | Sfrp4     | 2.9806476 |
| A_55_P2108768 | Col6a2    | 3.1360626 | A_52_P556099  | Oip5      | 2.9777246 |
| A_55_P1999633 | Cit       | 3.1314445 | A_55_P2105152 | Trim59    | 2.9771929 |
| A_55_P2037439 | Depdc1a   | 3.13088   | A_51_P139651  | Nos3      | 2.9695275 |
| A_51_P418116  | Tmem119   | 3.1297226 | A_52_P52849   | Cpxm2     | 2.9664185 |
| A_55_P1995007 | Arhgap11a | 3.1269655 | A_55_P2000743 | Kirrel    | 2.949359  |
| A_52_P5891    | Fam101b   | 3.1164098 | A_51_P455897  | Fam64a    | 2.94258   |
| A_55_P2167461 | Homer3    | 3.100387  | A_55_P2095271 | Pkn3      | 2.9319787 |
| A_55_P2015032 | Kazald1   | 3.0879328 | A_55_P1991718 | Hmmr      | 2.930425  |
| A_55_P1968928 | Def6      | 3.0839853 | A_52_P20906   | Twist1    | 2.9292948 |
| A_55_P2056654 | Kif22     | 3.0838487 | A_51_P133137  | Kif20a    | 2.9271085 |
| A_55_P2119985 | Baiap2    | 3.0773764 | A_51_P519791  | Ska3      | 2.9265118 |
| A_55_P1982049 | Icam2     | 3.0695086 | A_55_P2005838 | Ticrr     | 2.9240434 |
| A_51_P492830  | Cenph     | 3.0630379 | A_51_P117739  | Figf      | 2.9030569 |
| A_55_P1958537 | Map6      | 3.060607  | A_55_P2170681 | Cdca8     | 2.902731  |
| A_55_P2176145 | Rgs17     | 3.0523524 | A_51_P195153  | Gtse1     | 2.9025357 |
| A_55_P1989321 | Sat1      | 3.0402265 | A_52_P460537  | Lpar2     | 2.9015813 |

|               |               |           |               |               |           |
|---------------|---------------|-----------|---------------|---------------|-----------|
| A_51_P123405  | Bub1          | 3.0397656 | A_66_P114627  | S100a16       | 2.9014978 |
| A_51_P457528  | Ccnb2         | 3.0338523 | A_66_P114451  | Gpr126        | 2.899111  |
| A_51_P513530  | Spag5         | 3.0261045 | A_52_P452569  | Kirrel        | 2.897702  |
| A_51_P412914  | Efs           | 3.0213552 | A_52_P420466  | Hist1h2ab     | 2.897575  |
| A_55_P2149951 | Prx           | 3.0189447 | A_55_P2166501 | Cd44          | 2.8958702 |
| A_55_P1976127 | Ect2          | 3.01776   | A_51_P125135  | Cdca5         | 2.8920653 |
| A_55_P1976584 | Tmod2         | 3.0152657 | A_52_P229052  | Tmeff2        | 2.8911204 |
| A_51_P211765  | Rin1          | 3.0149472 | A_55_P2007273 | Pole          | 2.8881862 |
| A_51_P302139  | Mastl         | 3.0054991 | A_55_P2059931 | Prom1         | 2.8828073 |
| A_52_P211223  | Cdca2         | 3.0046873 | A_55_P1984307 | Gpr116        | 2.869508  |
| A_55_P2151056 | Rarg          | 3.0039883 | A_51_P490509  | Bub1b         | 2.863056  |
| A_51_P172231  | Gsdmd         | 2.9942446 | A_52_P348250  | Klhl29        | 2.8597836 |
| A_52_P476431  | Evc           | 2.8566508 | A_51_P100174  | Mns1          | 2.8575475 |
| A_51_P137111  | Chek2         | 2.8500872 | A_55_P2024993 | Hoxb4         | 2.7260926 |
| A_66_P138137  | Pnp           | 2.8471012 | A_51_P105709  | Trip13        | 2.723325  |
| A_55_P2030938 | Trim59        | 2.8466938 | A_51_P108252  | Gpsm2         | 2.7196949 |
| A_55_P1972720 | Pmm1          | 2.8463938 | A_55_P1956862 | Egfr          | 2.7190154 |
| A_55_P2197914 | Srgap1        | 2.8404524 | A_52_P125467  | Reep2         | 2.7166452 |
| A_55_P2017362 | BC068157      | 2.836458  | A_55_P2189893 | A630073K07Rik | 2.7166097 |
| A_55_P2013336 | Melk          | 2.8341742 | A_55_P2000280 | Mthfd1l       | 2.7097523 |
| A_55_P2266880 | Kirrel        | 2.8330197 | A_51_P513032  | Trps1         | 2.7034926 |
| A_51_P204402  | Shcbp1        | 2.8141005 | A_51_P429276  | Tmod3         | 2.6951137 |
| A_66_P133404  | 2810417H13Rik | 2.8033478 | A_55_P2010116 | Rab27b        | 2.6950455 |
| A_51_P487999  | Sgol1         | 2.8031306 | A_55_P2064043 | Cd44          | 2.6945493 |
| A_52_P206613  | Adss          | 2.8008156 | A_55_P2004801 | Tacc3         | 2.6939092 |
| A_55_P2171493 | BC030867      | 2.7987585 | A_55_P2014665 | Racgap1       | 2.6892688 |
| A_66_P125035  | Duxbl2        | 2.7983406 | A_55_P2038358 | Acot1         | 2.6881132 |
| A_55_P2037454 | Etv5          | 2.7949345 | A_55_P2015485 | Ccdc19        | 2.6833737 |
| A_51_P491987  | Ripk3         | 2.793135  | A_51_P520849  | Sfrp2         | 2.682533  |
| A_51_P172085  | Arhgdig       | 2.792364  | A_51_P270949  | Hist1h1b      | 2.6749337 |
| A_51_P151586  | Gsg2          | 2.790252  | A_51_P288916  | Tmtc2         | 2.6694012 |
| A_55_P2064984 | Cenpi         | 2.781655  | A_55_P1990341 | Ncapg         | 2.6652567 |
| A_55_P1987028 | Kifc5b        | 2.7790415 | A_55_P2077558 | Sod3          | 2.6626797 |
| A_52_P502771  | Rad54b        | 2.778432  | A_51_P408071  | Kntc1         | 2.660122  |

|               |          |           |               |           |           |
|---------------|----------|-----------|---------------|-----------|-----------|
| A_51_P123134  | Ercc6l   | 2.7773025 | A_55_P1959393 | Hhat      | 2.6530623 |
| A_55_P1995205 | Top2a    | 2.772372  | A_51_P220135  | Nfatc1    | 2.6528249 |
| A_55_P2040743 | Zwilch   | 2.769303  | A_55_P2109717 | Kif20b    | 2.634895  |
| A_51_P463087  | Cenpm    | 2.767622  | A_51_P467224  | Fbn1      | 2.631515  |
| A_66_P130541  | Traip    | 2.764734  | A_55_P1972719 | Pmm1      | 2.631147  |
| A_55_P2000943 | Nrip3    | 2.7615218 | A_55_P2103796 | Arhgap11a | 2.6174133 |
| A_55_P2012171 | Spata6   | 2.7538335 | A_55_P2099961 | Hist1h2ag | 2.6141691 |
| A_55_P2204804 | Dclk1    | 2.75351   | A_55_P1965154 | Spc25     | 2.6123686 |
| A_65_P05396   | Rad18    | 2.7470057 | A_51_P190111  | Mcm5      | 2.6037714 |
| A_51_P390967  | Slc43a3  | 2.7462025 | A_55_P2127702 | Racgap1   | 2.602209  |
| A_52_P167278  | Mthfd1l  | 2.7444296 | A_51_P293688  | Rab32     | 2.6018975 |
| A_52_P28806   | Foxm1    | 2.7397501 | A_52_P350537  | Mttr11    | 2.5924518 |
| A_52_P518997  | Epha2    | 2.7292318 | A_55_P1967291 | Ncaph     | 2.5863605 |
| A_52_P114905  | Ifitm10  | 2.7282917 | A_51_P487813  | Lxn       | 2.5861104 |
| A_52_P201206  | Scrn1    | 2.574254  | A_55_P2010622 | Sec16b    | 2.5751579 |
| A_55_P2034027 | Nos3     | 2.574151  | A_55_P2038247 | Tyro3     | 2.457083  |
| A_55_P2035286 | Uhrf1    | 2.5687377 | A_55_P1989981 | Fam129b   | 2.4498599 |
| A_52_P269942  | Cpt1c    | 2.5683703 | A_55_P2150343 | Fam38a    | 2.4470646 |
| A_55_P2121456 | Fam43a   | 2.5577354 | A_52_P191567  | Plcl1     | 2.445575  |
| A_55_P2110713 | Anxa2    | 2.5563364 | A_55_P2184449 | Gm10387   | 2.4449475 |
| A_51_P148105  | Rad51    | 2.5527055 | A_55_P1955279 | Specc1    | 2.4449325 |
| A_51_P314907  | Dbf4     | 2.5487869 | A_55_P2121521 | Hist1h3i  | 2.4449096 |
| A_55_P2147083 | Tnfaip6  | 2.546718  | A_55_P2056473 | Spc24     | 2.4433556 |
| A_55_P1969341 | Brip1    | 2.5438125 | A_55_P2048588 | Cdk1      | 2.4433448 |
| A_52_P201800  | Nanos1   | 2.5431135 | A_55_P2018904 | Gm5465    | 2.4429693 |
| A_55_P1975695 | Snx18    | 2.5315144 | A_51_P254045  | Traip     | 2.4403632 |
| A_55_P2152427 | Zwilch   | 2.5280752 | A_55_P2164534 | Dtl       | 2.4399781 |
| A_55_P2057686 | Cdc42ep5 | 2.5255249 | A_66_P120603  | Trps1     | 2.4393723 |
| A_51_P394802  | Fam111a  | 2.523401  | A_55_P1962747 | H2-Ab1    | 2.438183  |
| A_52_P104824  | Diap3    | 2.519928  | A_55_P2097553 | C77080    | 2.423738  |
| A_55_P2186648 | Bard1    | 2.517406  | A_55_P1987715 | Epb4.112  | 2.4219706 |
| A_55_P1982818 | Odc1     | 2.5166903 | A_66_P120074  | Uhrf1     | 2.4176254 |
| A_66_P131979  | Cdc6     | 2.5136158 | A_65_P20641   | Fads2     | 2.4138472 |
| A_52_P529570  | Nsl1     | 2.5123994 | A_51_P393958  | Fbxo5     | 2.410691  |

|               |           |           |               |           |           |
|---------------|-----------|-----------|---------------|-----------|-----------|
| A_52_P498208  | Hist1h2ak | 2.5107698 | A_52_P527106  | Arhgap12  | 2.406184  |
| A_52_P393314  | P2rx7     | 2.5015006 | A_52_P462472  | C77370    | 2.4034355 |
| A_55_P1987331 | Prl3d1    | 2.500798  | A_55_P2030721 | Ankle1    | 2.400851  |
| A_51_P196973  | Chaf1a    | 2.4958587 | A_51_P424810  | Ncapg2    | 2.3999689 |
| A_55_P1991688 | Rad51ap1  | 2.495593  | A_55_P2005585 | Trps1     | 2.3918388 |
| A_55_P2069221 | Prr11     | 2.4890509 | A_55_P2004881 | Ldlrad4   | 2.3908496 |
| A_51_P240614  | Tm4sf1    | 2.4834535 | A_66_P118513  | 11-Sep    | 2.388504  |
| A_51_P204442  | Phf19     | 2.4739256 | A_55_P2094524 | Gm14005   | 2.3874974 |
| A_55_P2062543 | Kifc1     | 2.469086  | A_55_P2041961 | Bmp2      | 2.3869092 |
| A_51_P317031  | Ccdc109b  | 2.46812   | A_55_P1981241 | Grasp     | 2.3807874 |
| A_55_P2098200 | Tpbg      | 2.4677062 | A_51_P332355  | Kif18a    | 2.3800998 |
| A_55_P2101757 | Dscc1     | 2.4662392 | A_55_P2085412 | Ankle1    | 2.3758974 |
| A_55_P2084631 | Hist1h2an | 2.463547  | A_52_P380369  | Phf11d    | 2.3752544 |
| A_55_P2007389 | Fam189b   | 2.4622793 | A_51_P367310  | Chaf1b    | 2.3751657 |
| A_55_P2000778 | Kif7      | 2.4617934 | A_55_P2036883 | Hist2h2bb | 2.3737593 |
| A_55_P2140031 | Fam129b   | 2.4605255 | A_55_P1978201 | Incenp    | 2.3720763 |
| A_66_P108143  | Fbxw10    | 2.3673067 | A_52_P634090  | Jag1      | 2.2472148 |
| A_51_P453043  | Aacs      | 2.364335  | A_55_P1989296 | Tnxb      | 2.238779  |
| A_55_P2048119 | Slc29a4   | 2.3622744 | A_51_P306218  | Xkr5      | 2.236555  |
| A_51_P299216  | Wdr90     | 2.3594036 | A_51_P246339  | Rfc5      | 2.235493  |
| A_52_P457967  | Trerf1    | 2.3496401 | A_66_P134481  | Skp2      | 2.2353992 |
| A_55_P2041070 | Tle3      | 2.347125  | A_51_P128876  | Ifitm3    | 2.2333114 |
| A_55_P2019463 | Tnks1bp1  | 2.3452613 | A_55_P1961730 | Kcnt2     | 2.2300813 |
| A_51_P432794  | Fam115c   | 2.344881  | A_55_P2012166 | Spata6    | 2.2292001 |
| A_52_P127682  | Dagla     | 2.3433754 | A_55_P2154252 | Gfpt2     | 2.226789  |
| A_55_P2065953 | Btbd19    | 2.342753  | A_51_P330213  | Asf1b     | 2.2257009 |
| A_55_P2086659 | Rad54l    | 2.3358805 | A_55_P2106150 | Cenpk     | 2.2183182 |
| A_52_P75348   | Spdl1     | 2.3287234 | A_51_P241645  | Tmem194   | 2.2148042 |
| A_52_P208613  | Fancb     | 2.3260117 | A_55_P2000833 | E2f8      | 2.214217  |
| A_55_P2056325 | Anxa3     | 2.3212445 | A_66_P128909  | Numbl     | 2.214057  |
| A_51_P405606  | Ndrp1     | 2.316399  | A_55_P2122605 | Cbr2      | 2.2092533 |
| A_52_P1026777 | Escr      | 2.3122125 | A_55_P1994939 | Hmgb2     | 2.1965373 |
| A_52_P155554  | Cdc42ep2  | 2.3115675 | A_51_P334942  | Aldh1a1   | 2.1943865 |
| A_51_P237383  | Rnase4    | 2.3097575 | A_55_P2002578 | Ephx1     | 2.1877406 |

|               |          |           |               |           |           |
|---------------|----------|-----------|---------------|-----------|-----------|
| A_52_P282838  | Spin2    | 2.3068016 | A_55_P2177998 | Tmprss13  | 2.1860015 |
| A_51_P281380  | Tspan5   | 2.3036907 | A_52_P231170  | Megf9     | 2.184845  |
| A_55_P2108012 | Fam78b   | 2.3008935 | A_51_P260504  | Arhgef4   | 2.1840866 |
| A_55_P2028054 | Incenp   | 2.3003485 | A_55_P2016652 | Cdk1      | 2.174548  |
| A_55_P2317665 | E2f1     | 2.2996154 | A_52_P158431  | Tshz2     | 2.1675797 |
| A_52_P591166  | Dpysl2   | 2.295929  | A_51_P195034  | Esco2     | 2.1546135 |
| A_51_P281089  | S100a6   | 2.2951696 | A_55_P1953087 | Mcm3      | 2.1530664 |
| A_51_P191649  | Ndc80    | 2.2937024 | A_51_P227392  | Rhou      | 2.1519089 |
| A_55_P2172274 | Smc2     | 2.2912965 | A_55_P2020148 | Zfp239    | 2.1510825 |
| A_55_P1968355 | Tle1     | 2.2843323 | A_55_P2052290 | Psat1     | 2.1496198 |
| A_55_P2429225 | Psrc1    | 2.2837493 | A_51_P469008  | Ehd1      | 2.149087  |
| A_51_P427603  | BC018242 | 2.2758195 | A_55_P2133255 | Mad2l1    | 2.1462216 |
| A_51_P351970  | Hells    | 2.2694194 | A_51_P231630  | Zfp239    | 2.146201  |
| A_51_P372550  | Cgref1   | 2.26249   | A_51_P407248  | Antxr1    | 2.1461911 |
| A_55_P2133165 | Wwc1     | 2.2592406 | A_65_P17218   | Mndal     | 2.1428928 |
| A_55_P2062598 | E2f7     | 2.2570715 | A_52_P151320  | Tnfaip8l1 | 2.1421633 |
| A_52_P64763   | Gen1     | 2.25424   | A_55_P1975021 | Rad18     | 2.1410556 |
| A_52_P556462  | Fancd2   | 2.2481968 | A_52_P590535  | Fbln2     | 2.1398883 |
| A_51_P208680  | Chtf18   | 2.136382  | A_51_P410918  | Tor4a     | 2.054474  |
| A_55_P2001998 | Zfp503   | 2.1353548 | A_55_P1972039 | Nox4      | 2.0544324 |
| A_52_P512817  | Shisa5   | 2.1340823 | A_52_P304947  | Cenpn     | 2.0523508 |
| A_55_P2156016 | Recql4   | 2.1329093 | A_55_P2000658 | Gm15645   | 2.0498903 |
| A_66_P102090  | Pkmyt1   | 2.1275618 | A_66_P104815  | Ecm1      | 2.0469174 |
| A_51_P241791  | Mif1ip   | 2.1208868 | A_52_P98625   | Sowahc    | 2.0467753 |
| A_52_P609024  | Cenpw    | 2.1164157 | A_55_P2002129 | Rgs12     | 2.045846  |
| A_55_P2149107 | BC055324 | 2.1159973 | A_55_P2024290 | Fam149a   | 2.0442805 |
| A_51_P223709  | Pask     | 2.1151268 | A_66_P106113  | Rhoj      | 2.0440416 |
| A_65_P17827   | Cenpl    | 2.1149733 | A_55_P2084656 | Hist1h2ah | 2.0429752 |
| A_55_P2086423 | Recql4   | 2.1061614 | A_55_P2039881 | 5-Sep     | 2.0421493 |
| A_55_P2085181 | Chaf1b   | 2.1036687 | A_51_P356931  | Orc1      | 2.0409997 |
| A_51_P347240  | Lrr1     | 2.101033  | A_55_P2042823 | Sh3bp2    | 2.0374854 |
| A_55_P2039320 | Zfp365   | 2.098049  | A_55_P2069597 | Tspan17   | 2.036126  |
| A_52_P437795  | Cdh11    | 2.0894513 | A_51_P466229  | Pdgfrl    | 2.0351367 |
| A_55_P2032750 | Cpt1c    | 2.0879645 | A_55_P2027087 | Plcl1     | 2.0290952 |



|               |        |           |               |           |           |
|---------------|--------|-----------|---------------|-----------|-----------|
| A_55_P2000354 | Rgs11  | 2.0878568 | A_51_P190254  | Scrn1     | 2.0285559 |
| A_51_P300709  | Srm    | 2.086297  | A_55_P2084652 | Hist1h2ak | 2.0279403 |
| A_51_P472274  | Sox18  | 2.079722  | A_55_P2030536 | Ccnyl1    | 2.0275261 |
| A_55_P2123496 | Jam2   | 2.0759068 | A_51_P517051  | Gatsl3    | 2.0267055 |
| A_65_P20433   | Parpbp | 2.0735905 | A_66_P137605  | Mb21d1    | 2.026433  |
| A_55_P2045258 | Ehd1   | 2.0734859 | A_52_P106259  | Egfr      | 2.0253048 |
| A_55_P2063465 | Thbs3  | 2.0720322 | A_51_P125986  | Gan       | 2.018743  |
| A_51_P427530  | Pgm1   | 2.071374  | A_55_P1964787 | Slc35e4   | 2.0096962 |
| A_51_P301394  | Gspt2  | 2.0657253 | A_51_P209807  | Ccnyl1    | 2.0070941 |
| A_51_P505823  | Endod1 | 2.061496  | A_51_P171288  | Gli3      | 2.005231  |
| A_51_P275976  | Dok1   | 2.0606222 | A_55_P2236291 | Ppap2a    | 2.0050724 |
| A_66_P121495  | Psat1  | 2.058627  | A_52_P330214  | Fanca     | 2.0049188 |
| A_55_P2138333 | Mad2l1 | 2.0564246 | A_52_P436238  | Odc1      | 2.0020258 |
| A_52_P278295  | Pear1  | 2.0552857 | A_55_P2457154 | G2e3      | 2.0009356 |

### Down-regulation

| Probe Name    | Gene Symbol | Fold Change | Probe Name    | Gene Symbol | Fold Change |
|---------------|-------------|-------------|---------------|-------------|-------------|
| A_51_P363187  | Cxcl1       | 8.819109    | A_51_P378051  | Aoc3        | 3.4195278   |
| A_51_P371750  | Marco       | 4.244317    | A_51_P509573  | Ccl4        | 3.2854807   |
| A_51_P140710  | Ccl3        | 3.8399758   | A_51_P110301  | C3          | 3.143817    |
| A_55_P2011872 | Scd4        | 3.1273491   | A_52_P419373  | Lrrc39      | 2.2218037   |
| A_55_P2010066 | Capn3       | 3.066352    | A_52_P537827  | Wdr72       | 2.211024    |
| A_52_P638459  | Ccl5        | 3.0502234   | A_55_P2131899 | Sox4        | 2.2036295   |
| A_51_P438805  | Txnip       | 2.960222    | A_55_P1968958 | Cycs        | 2.1992636   |
| A_55_P1961127 | H19         | 2.7792394   | A_55_P2083511 | Fam179a     | 2.1970444   |
| A_51_P485405  | Gtsf1       | 2.753445    | A_51_P224064  | Klhl38      | 2.1529965   |
| A_55_P2049717 | AgRP        | 2.614552    | A_52_P411430  | Gm5914      | 2.1467266   |
| A_66_P125223  | Gm14492     | 2.5872364   | A_55_P2156155 | Gadl1       | 2.1390762   |
| A_55_P2137611 | Irgm2       | 2.507127    | A_51_P186476  | Slc11a1     | 2.1028404   |
| A_51_P112355  | Igtp        | 2.500275    | A_55_P2012849 | Dock10      | 2.096866    |
| A_55_P2006255 | Txnip       | 2.4396472   | A_55_P2144386 | Emr1        | 2.0907123   |
| A_52_P495565  | Efnb3       | 2.4059038   | A_55_P2069818 | Mapk10      | 2.0728924   |
| A_55_P2048607 | Hp          | 2.3700798   | A_52_P54280   | Adck3       | 2.0677137   |
| A_51_P149714  | Ms4a6d      | 2.3155587   | A_55_P2121608 | Sox4        | 2.058894    |

|               |         |           |               |        |           |
|---------------|---------|-----------|---------------|--------|-----------|
| A_55_P1964598 | Hsd17b7 | 2.2948925 | A_66_P119771  | Nme8   | 2.0545104 |
| A_55_P2004213 | Gprasp2 | 2.290954  | A_55_P2150757 | Gzmm   | 2.050169  |
| A_51_P134452  | Lpar3   | 2.2610373 | A_51_P285413  | Rbbp6  | 2.0317993 |
| A_66_P119968  | Clec4a1 | 2.2528236 | A_55_P1984655 | Smtnl2 | 2.0299695 |
| A_55_P2153496 | Ppp2r3d | 2.241007  | A_52_P518808  | Mmd    | 2.0077486 |
| A_51_P126337  | Fgf12   | 2.231632  | A_52_P400425  | Pirt   | 2.005233  |
| A_51_P111612  | Arrdc4  | 2.2245975 | A_55_P1971174 | Cd1d2  | 2.002264  |

**Table S2.** Sequences of cDNAs of FoxM1, Id1, Hmgb2, and Jnk3-shRNAs.

| <b>Selected genes for overexpression in CMs</b> |                               |                                  |
|-------------------------------------------------|-------------------------------|----------------------------------|
| <b>Gene name</b>                                | <b>Forward 5'-3'</b>          | <b>Reverse 5'-3'</b>             |
| FoxM1                                           | CGAAGCGGCCTCACGATGAGAACAAGCCC | CTTGCAGTACTCGCAGCTAAGGGATGAACTG  |
| Id1                                             | CCTGCTCGAGGGATCATGAAGGTCGCCAG | CTCAAGTACTCGCCTCAGCGACACAAGA     |
| Hmgb2                                           | ACGCGAATTCGTCGTCATGGGCAAGGG   | CACTGATATCCAGCCACTTATTCTTCATCCTC |
| <b>Specific shRNAs targeting Jnk3</b>           |                               |                                  |
| <b>shRNAs</b>                                   | <b>Targeting sequences</b>    |                                  |
| Jnk3-shRNA                                      | CAATAGAGAGATCCAACATAA         |                                  |

**Table S3.** List of primers utilized in real-time PCR.

| Gene name                                            | Forward 5'-3'           | Reverse 5'-3'             |
|------------------------------------------------------|-------------------------|---------------------------|
| <b>Genes from CM reprogramming day 2</b>             |                         |                           |
| <i>FoxM1</i>                                         | CACTTGGATTGAGGACCACTT   | GTCGTTTCTGCTGTGATTCC      |
| <i>Id1</i>                                           | CGACTACATCAGGGACCTGCA   | GAACACATGCCGCCTCGG        |
| <i>Jnk3</i>                                          | AAACTACGTGGAGAATGCGCC   | TGGCTTGGCTGGCTTTAAGT      |
| <i>Hmgb2</i>                                         | TGTCCTCGTACGCCTTCTTC    | CCTCCTCATCTTCTGGTTTCG     |
| <i>E2f8</i>                                          | GAGAAATCCCAGCCGAGTC     | CATAAATCCGCCGACGTT        |
| <i>Spon2</i>                                         | CGGCCAAATACAGCATCACC    | CCCAGCAGCGAAGACCACT       |
| <i>Plk1</i>                                          | GCCCCTCACAGTCCTCAATA    | TACCCAAGGCCGTACTTGTC      |
| <i>Ccl5</i>                                          | TGCGAGGACTCTGAGACAGC    | GAGTGGTGTCCGAGCCATA       |
| <i>Fgf12</i>                                         | TGTATCGCCAACAGGAATCAGG  | GGAGAGGGAAGAACGGAGAG      |
| <b>Genes for each functional group in microarray</b> |                         |                           |
| <i>Krt6a</i>                                         | AGAGAGGGGTGCGCATGAACT   | TCATCTGTTAGACTGTCTGCCTT   |
| <i>Elf3</i>                                          | GGCCCTCATGGCTGCCACCT    | TTGGGATCTTGTCTGAGGTCCTGGA |
| <i>Ocln</i>                                          | ATCCACCTATCACTTCAGA     | TAATCTCCCACCATCCTC        |
| <i>Cldn3</i>                                         | GGCGGCTCTGCTCACCTTA     | CGTACAACCCAGCTCCCATC      |
| <i>Fgf4</i>                                          | CGTGGTGAGCATCTTCGGAGTGG | CCTTCTTGGTCCGCCCGTTCTTA   |
| <i>Fdps</i>                                          | ATGGAGATGGGCGAGTTCTTC   | CCGACCTTTCCCGTCACA        |
| <i>Hmgcs1</i>                                        | GCCGTGAACTGGGTGCAA      | GCATATATAGCAATGTCTCCTGCAA |
| <i>Cgn</i>                                           | CTAAACCGACTTCCTCGATTAA  | TGTTGATGAGCGAGTCCACTG     |
| <i>Tjp2</i>                                          | AAGTTCCCTGCCTACGAG      | ATTCAACCGAACCACTCC        |
| <b>Genes for mechanism</b>                           |                         |                           |
| <i>Cdk4</i>                                          | AGTCAGTGGTGCCAGAGAT     | AGATTGCTTATGTGGGTTA       |
| <i>Cdk2</i>                                          | TGTGCCTCCCCTGGATGAAG    | CATCCTGGAAGAAAGGGTGA      |
| <i>Cdk1</i>                                          | GTCCGTCGTAACCTGTTGAG    | TGACTATATTTGGATGTCGAAG    |
| <i>p16</i>                                           | GAACTCTTTCCGGTCGTACCC   | CGAATCTGCACCGTAGTTGA      |
| <i>p21</i>                                           | GCAGATCCACAGCGATATCC    | CAACTGCTCACTGTCCACGG      |
| <i>p27</i>                                           | GGGCAGATACGAGTGGCAG     | CCTGAGACCCAATTAAGGCAC     |
| <i>Aurkb</i>                                         | CATCCCTGAGGAGGAAGACC    | TTCATAGCAGAGCACCCCG       |
| <i>Mad2L1</i>                                        | TGGTAGTGTTCTCCGTTGATCT  | GCAGGGTGATGCCTTGCT        |

**Table S4.** List of *p*-values in each figure.

| Figure                         | <i>p</i> -value                                                                                                                                                                                                                                                                                                                                                                  | Figure                                                | <i>p</i> -value                                                                                                                                                                                                                                                                        |
|--------------------------------|----------------------------------------------------------------------------------------------------------------------------------------------------------------------------------------------------------------------------------------------------------------------------------------------------------------------------------------------------------------------------------|-------------------------------------------------------|----------------------------------------------------------------------------------------------------------------------------------------------------------------------------------------------------------------------------------------------------------------------------------------|
| <b>Fig 3A</b>                  | $p(\text{Id1})=0.0059$<br>$p(\text{Hmgb2})=0.0214$<br>$p(\text{FoxM1})=0.0245$<br>$p(\text{Jnk3})=0.0096$                                                                                                                                                                                                                                                                        | <b>Fig 3C</b>                                         | $p(\text{F})=0.0349$<br>$p(\text{I})=0.039$<br>$p(\text{H})=0.3225$<br>$p(\text{Ji})=0.0146$<br>$p(\text{FI})=0.0004$<br>$p(\text{Iji})=0.003$<br>$p(\text{Fji})=0.0268$<br>$p(\text{FIji})=0.0002$                                                                                    |
| <b>Fig 3D</b><br><b>Fig 3H</b> | $p\text{-value}=0.041$<br>$p\text{-value}=0.0176$                                                                                                                                                                                                                                                                                                                                | <b>Fig 3E</b>                                         | $p(\text{H3P})=0.0036$<br>$p(\text{AURKB})=0.0123$                                                                                                                                                                                                                                     |
| <b>Fig 4B</b><br><b>Fig 4C</b> | $p\text{-value}=0.0121$<br>$p\text{-value}=0.0003$                                                                                                                                                                                                                                                                                                                               | <b>Fig 4E</b><br><b>Fig 4F</b>                        | $p\text{-value}=0.0008$<br>$p\text{-value}=0.0406$                                                                                                                                                                                                                                     |
| <b>Fig 5C</b>                  | $p(\text{BrdU})=0.0016$<br>$p(\text{H3P})=0.0053$                                                                                                                                                                                                                                                                                                                                | <b>Fig 5E</b><br><br><b>Fig 5F</b>                    | $p(+dP/dt)=0.0019$<br>$p(-dP/dt)=0.007$<br>$p(\text{ESPVR})=0.0052$<br>$p(\text{PRSW})=0.0247$<br>$p(\text{Tau})=0.0669$<br><br>$p\text{-value}=0.0189$                                                                                                                                |
| <b>Fig 5D</b>                  | $p(\text{EF\%-D1})=0.0743$<br>$p(\text{EF\%-D21})=0.0127$<br>$p(\text{FS\%-D1})=0.0676$<br>$p(\text{EF\%-D21})=0.014$                                                                                                                                                                                                                                                            |                                                       |                                                                                                                                                                                                                                                                                        |
| <b>Fig 6A</b>                  | $p(\text{Aurkb-F})=0.0438$<br>$p(\text{Aurkb-I})=0.0331$<br>$p(\text{Aurkb-Js})=0.0059$<br>$p(\text{Aurkb-FIJs})=0.0002$<br>$p(\text{Mad2L1-F})=0.0118$<br>$p(\text{Mad2L1-I})=0.0002$<br>$p(\text{Mad2L1-Js})=0.0055$<br>$p(\text{Mad2L1-FIJs})=0.0091$<br>$p(\text{Plk1-F})=0.0017$<br>$p(\text{Plk1-I})=0.0037$<br>$p(\text{Plk1-Js})=0.0029$<br>$p(\text{Plk1-FIJs})=0.0011$ | <b>Fig 6B</b>                                         | $p(\text{Cdk4 -I})=0.0196$<br>$p(\text{Cdk4-FIJs})=0.0019$<br><br>$p(\text{Cdk2-F})=0.0344$<br>$p(\text{Cdk2 -Js})=0.0124$<br>$p(\text{Cdk2-FIJs})=0.0074$<br><br>$p(\text{Cdk1-F})=0.0001$<br>$p(\text{Cdk1-I})=0.0334$<br>$p(\text{Cdk1-Js})=0.0124$<br>$p(\text{Cdk1-FIJs})=0.0002$ |
| <b>Fig 6C</b>                  | $p(p16\text{-I})=0.0114$<br>$p(p16\text{-FIJs})=0.0393$<br>$p(p21\text{-F})=0.0002$<br>$p(p21\text{-FIJs})=0.0016$<br>$p(p27\text{-Js})=0.0406$<br>$p(p27\text{-FIJs})=0.011$                                                                                                                                                                                                    | <b>Appendix Fig S2B</b><br><br><b>Appendix Fig S5</b> | $p\text{-value}=0.0011$<br>$p(\text{F-D4})<0.0001$ ; $p(\text{F-D21}) <0.0001$<br>$p(\text{I-D1})=0.0114$<br>$p(\text{Js-D1})=0.0209$<br>$p(\text{Js-D7})=0.0134$<br>$p(\text{Js-D21})=0.03$                                                                                           |

# Appendix figures

## Figure S1

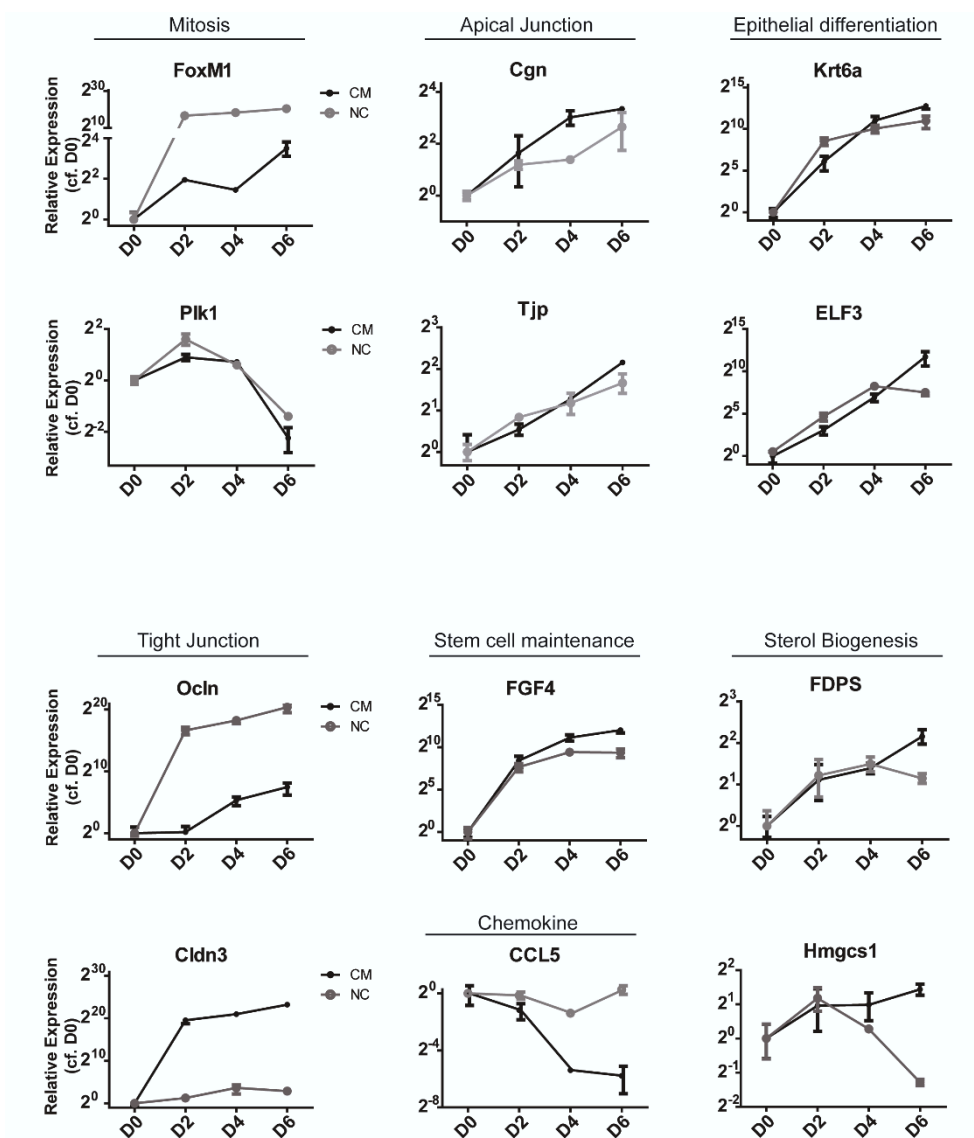

Figure S1. Real-time PCR validation of selected genes in each microarray functional group.

## Figure S2

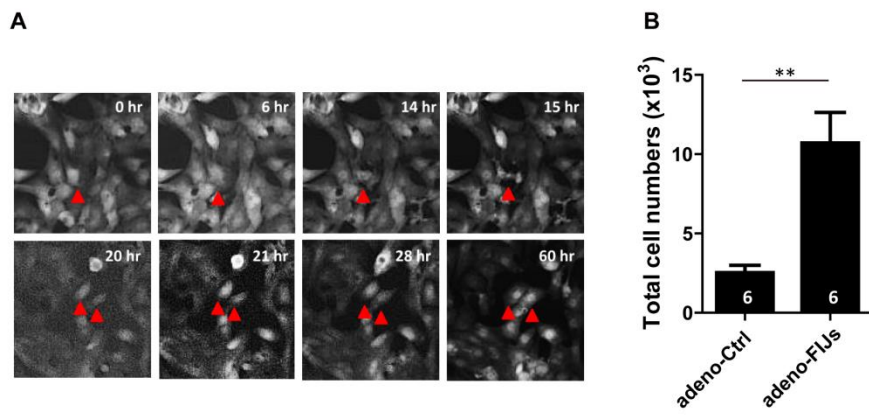

**Figure S2. FIJs-treated CMs undergo complete cell cycle to increase total cell numbers**

A The time-lapse microscopy of the complete cell cycle of isolated CMs.

B Total numbers of isolated CMs after treating with adeno-Ctrl or adeno-FIJs. \*\*,  $P < 0.01$ .

## Appendix Figure S3

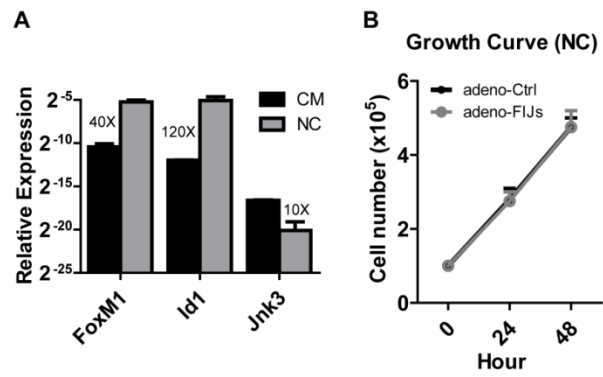

**Figure S3. The various effects of the FIJs treatment in the heart.**

A RNA expression of cardiac FoxM1, Id1, or Jnk3 in CMs and NCs.

B The growth curve of NCs after adeno-Ctrl or adeno-FIJs treatment.



## Appendix Figure S4

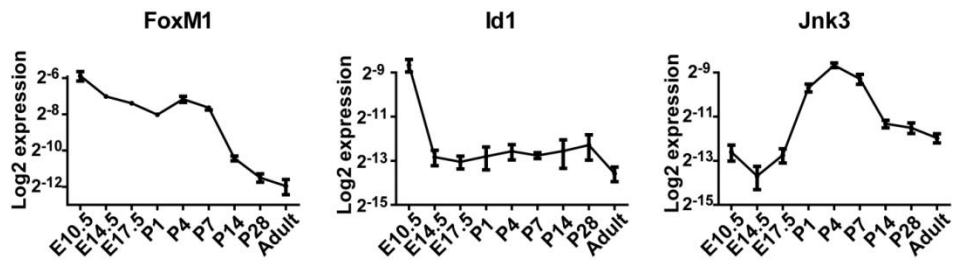

Figure S4. Transcriptional changes of cardiac FoxM1, Id1, or Jnk3 during development.

## Appendix Figure S5

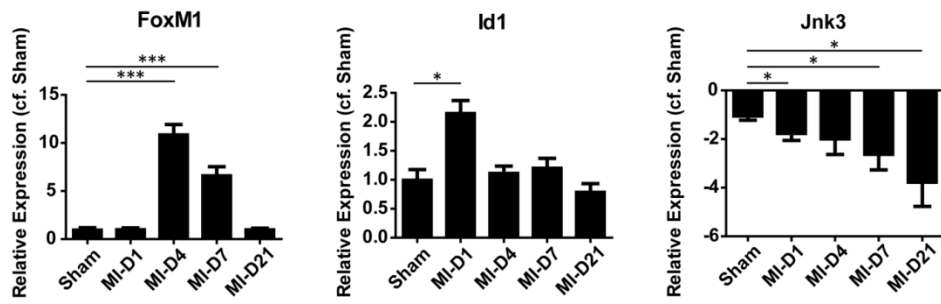

Figure S5. Transcriptional changes of cardiac FoxM1, Id1, or Jnk3 after MI.

\*,  $P < 0.05$ , and \*\*\*,  $P < 0.001$ .

## Appendix Figure S6

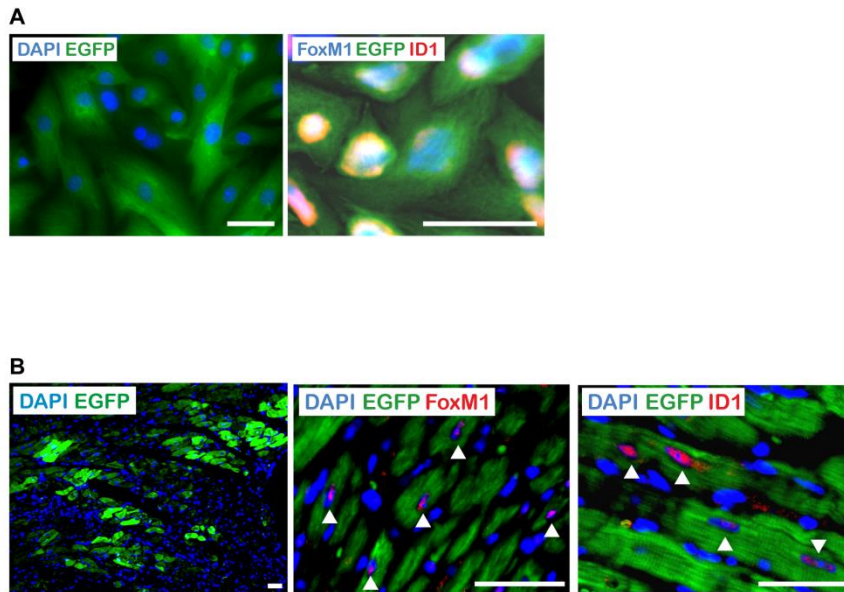

**Fig S6 Adenoviral infection efficiency of CMs after adeno-FIJs treatment.**

A EGFP expression combined with immunofluorescence staining of FoxM1 and Id1 in CMs after adeno-FIJs treatment *in vitro*.

B Immunofluorescence staining of EGFP and FoxM1 or Id1 in CMs after adeno-FIJs treatment *in vivo*.

The scale bar represents 50  $\mu\text{m}$ .
